## Genome analysis

# Liftoff: accurate mapping of gene annotations

Alaina Shumate <sup>1,2,\*</sup> and Steven L. Salzberg <sup>1,2,3,4</sup>

<sup>1</sup>Department of Biomedical Engineering, Johns Hopkins University, Baltimore, MD 21218, USA, <sup>2</sup>Center for Computational Biology, Whiting School of Engineering, Johns Hopkins University, Baltimore, MD 21211, USA, <sup>3</sup>Department of Computer Science, Johns Hopkins University, Baltimore, MD 21218, USA and <sup>4</sup>Department of Biostatistics, Bloomberg School of Public Health, Johns Hopkins University, Baltimore, MD 21205, USA

\*To whom correspondence should be addressed.  
Associate Editor: Alfonso Valencia

Received on July 2, 2020; revised on October 22, 2020; editorial decision on November 20, 2020; accepted on November 24, 2020

## Abstract

**Motivation:** Improvements in DNA sequencing technology and computational methods have led to a substantial increase in the creation of high-quality genome assemblies of many species. To understand the biology of these genomes, annotation of gene features and other functional elements is essential; however, for most species, only the reference genome is well-annotated.

**Results:** One strategy to annotate new or improved genome assemblies is to map or ‘lift over’ the genes from a previously annotated reference genome. Here, we describe Liftoff, a new genome annotation lift-over tool capable of mapping genes between two assemblies of the same or closely related species. Liftoff aligns genes from a reference genome to a target genome and finds the mapping that maximizes sequence identity while preserving the structure of each exon, transcript and gene. We show that Liftoff can accurately map 99.9% of genes between two versions of the human reference genome with an average sequence identity >99.9%. We also show that Liftoff can map genes across species by successfully lifting over 98.3% of human protein-coding genes to a chimpanzee genome assembly with 98.2% sequence identity.

**Availability and implementation:** Liftoff can be installed via bioconda and PyPI. In addition, the source code for Liftoff is available at <https://github.com/agshumate/Liftoff>.

**Contact:** [alainashumate@gmail.com](mailto:alainashumate@gmail.com)

**Supplementary information:** [Supplementary data](#) are available at *Bioinformatics* online.

## 1 Introduction

Recent developments in DNA sequencing technology have greatly reduced the time and money needed to sequence and assemble new genomes. Currently, there are 13 420 eukaryotic genome assemblies in GenBank, of which ~10 000 have been added in the last 5 years alone. For most well-studied organisms, multiple assemblies are produced over time. The most well-known example of this is the human genome, but other model organisms such as mouse, zebrafish (Church *et al.*, 2011), rhesus macaque (He *et al.*, 2019), maize (Jiao *et al.*, 2017) and many others have had a series of gradually improved assemblies. The addition of new and improved genome assemblies is a starting point for genetic studies of many species; however, to be maximally useful, the genes and other functional elements need to be annotated. Unfortunately, the annotation of new genomes has not kept pace with sequencing and assembly. This is evident in GenBank, where only 3540 of the 13 420 eukaryotic genomes have any annotation at all. Eukaryotic genome annotation is a challenging, imperfect process that requires a combination of computational predictions, experimental validation and manual

curation. Repeating this costly process for each updated or new genome assembly is unnecessary. Instead, a more scalable approach is to take the annotation from a previously annotated member of the same or closely related species, and then map or ‘lift over’ gene models from the annotated genome onto the new assembly.

Current strategies for this task use tools, such as UCSC liftOver (Kuhn *et al.*, 2013) or CrossMap (Zhao *et al.*, 2014), to convert the coordinates of genomic features between assemblies; however, these tools only work with a limited number of species and they rely only on sequence homology to find a one-to-one mapping between genomic coordinates in the reference and coordinates in the target. This strategy is often inadequate when converting genomic intervals, like a gene feature, rather than a single coordinate. If the interval is no longer continuous in the target genome, current strategies will either split the interval and map it to different locations, or map the spanned interval to the target genome (Gao *et al.*, 2018). In many cases, this disrupts the biological integrity of the genomic feature; for example, if the interval is split and mapped to different chromosomes or strands, or spans a large genomic distance, it may not be possible for it to represent a single gene feature. Furthermore, prior

tools convert each feature independently, so while every exon from one transcript may be lifted over to a continuous interval, the combination of exons in the target genome may not necessarily form a biologically meaningful transcript. Mapping each feature independently also often results in multiple paralogous genes incorrectly mapping to a single locus.

Here, we introduce Liftoff, an accurate tool that maps annotations described in General Feature Format (GFF) or General Transfer Format (GTF) between assemblies of the same, or closely related species. Unlike current coordinate lift-over tools which require a pre-generated ‘chain’ file as input, Liftoff is a standalone tool that takes two genome assemblies and a reference annotation as input and outputs an annotation of the target genome. Liftoff uses Minimap2 (Li, 2018) to align the gene sequences from a reference genome to the target genome. Rather than aligning whole genomes, aligning only the gene sequences allows genes to be lifted over even if there are many structural differences between the two genomes. For each gene, Liftoff finds the alignments of the exons that maximize sequence identity while preserving the transcript and gene structure. If two genes incorrectly map to overlapping loci, Liftoff determines which gene is most-likely mis-mapped, and attempts to re-map it. Liftoff can also find additional gene copies present in the target assembly that are not annotated in the reference.

Previously, we have used Liftoff to map genes from GRCh38 to a new Ashkenazi human reference genome (Shumate et al., 2020). In additional previous work, we used Liftoff to annotate an updated assembly of the bread wheat genome, *Triticum aestivum* (Alonge et al., 2020). Here, in addition to describing the algorithm itself, we present two more examples demonstrating the accuracy and versatility of Liftoff. First, we map genes between two versions of the human reference genome. Next, to demonstrate a cross-species lift over, we map protein-coding genes from the human reference genome to a chimpanzee genome assembly.

## 2 Implementation

Liftoff is implemented as a python command-line tool. The main goal of Liftoff is to align gene features from a reference genome to a target genome and use the alignment(s) to optimally convert the coordinates of each exon. An optimal mapping is one in which the sequence identity is maximized while maintaining the integrity of each exon, transcript and gene. While our discussion of Liftoff here focuses on lifting over genes, transcripts and exons, it will work for any feature, or group of hierarchical features present in a GFF or GTF file.

As input, Liftoff takes a reference genome sequence and a target genome sequence in FASTA format, and a reference genome annotation in GFF or GTF format. The reference annotation is processed with gffutils (https://github.com/daler/gffutils), which uses a sqlite3 database to track the hierarchical relationships within groups of features (e.g. gene, transcript, exon). Using pyfaidx (Shirley et al., 2015), Liftoff extracts gene sequences from the reference genome and then invokes Minimap2 to align the entire gene sequence including exons and introns to the target. The Minimap2 parameters are set to output up to 50 secondary alignments for each sequence in SAM format. In addition, the end bonus parameter in Minimap2 is set to five to favor end-to-end alignments as opposed to soft-clipping mismatches at the end of alignments. While these parameters work well for the examples presented here, Liftoff allows the user to change or add any additional Minimap2 options. By default, genes are aligned to the entire target genome, but for chromosome-scale assemblies, the user can enable an option to align genes chromosome by chromosome. Under that option, only those genes which fail to map to their expected chromosome are then aligned to the entire genome.

In many cases, a gene has a single complete alignment to the target genome, which makes finding the optimal mapping trivial. In other cases, differences between the two genomes cause the gene to align in many fragmented pieces, and the optimal mapping is some combination of alignments. To find this combination, Liftoff uses networkx (https://github.com/networkx/networkx) to build a

directed acyclic graph representing the alignments as follows. Using Pysam (https://github.com/pysam-developers/pysam) to parse the Minimap2 alignments, each alignment is split at every insertion and deletion in order to form a group of gapless alignment blocks. Blocks not containing any part of an exon are discarded, and the remaining blocks are represented by nodes in the graph. Two nodes  $u$  and  $v$  are connected by an edge if the following conditions are true.

1.  $u$  and  $v$  are on the same chromosome or contig.
2.  $u$  and  $v$  are on the same strand.
3.  $u$  and  $v$  are in the correct 5' to 3' order.
4. The distance from the start of  $u$  to the end of  $v$  in the target genome is no greater than 2 times that in the reference genome.

Nodes in the graph are weighted according to mismatches within exons. By default, a mismatch within an exon incurs a penalty of two. Edges are assigned a weight according to the length of gaps within exons. By default, opening a gap in an exon incurs a penalty of two, and extending it incurs a penalty of one. Mismatches and gaps within introns are not counted. The mismatch, gap open and gap extend parameters can be changed by the user. A source and sink are added to the graph representing the start and end of the gene respectively, and the shortest path from source to sink is found using Dijkstra's algorithm (Dijkstra et al., 1959) where the weight function between two nodes  $u$  and  $v$  is

$$\frac{\text{weight}_u + \text{weight}_v}{2} + \text{weight}_{\text{edge}}$$

The shortest path represents the combination of aligned blocks that is concordant with the original structure of the gene and minimizes the number of mismatches and indels within exons. The alignments in this path define the final placement of the gene. Using the coordinates of the aligned blocks in the shortest path, the coordinates of each exon are converted to their respective coordinates in the target genome. A simple example of this process is shown in Figure 1, which illustrates lifting over a 5-exon transcript from the human reference genome (GRCh38) to a chimpanzee genome (PTRv2). This gene has a large intronic deletion in PTRv2 and does not have an end-to-end alignment, but it can still be successfully lifted over using our algorithm. One of the main challenges with gene annotation lift over is correctly mapping homologous genes from multi-gene families. Two different genes may optimally map to the same locus if they are identical or nearly identical. To handle this situation, after Liftoff maps all genes to their best matches, it checks for pairs of genes on the reference genome that have incorrectly mapped to overlapping (or identical) locations on the target genome, and it then attempts to find another valid mapping for one of the genes. Liftoff first tries to remap the gene with the lower sequence identity. If the genes mapped with the same sequence identity, Liftoff considers the neighboring genes and tries to remap the gene that appears out of order according to the reference annotation. When remapping the gene, Liftoff rebuilds the graph of aligned blocks excluding any blocks that overlap the homologous gene. The shortest path through this new graph represents the best mapping for this gene that does not overlap its homolog. If another valid mapping does not exist, the gene with lower identity is considered unmapped. This process is repeated until there are no genes mapped to overlapping loci. Liftoff then outputs a GFF or GTF file with the coordinates on the target genome of all of the features from the original annotation, and a text file with the IDs of any genes that could not be lifted over.

Note that differences in the genome sequences themselves may result in Liftoff mapping a gene to a paralogous location. For example, consider a gene family with five members on the reference genome but only four members on the target. The fifth gene might simply be unmapped, but if the target has a paralogous copy elsewhere, and if that copy is not matched by a homolog on the reference, then Liftoff will map the fifth gene to the paralogous location.

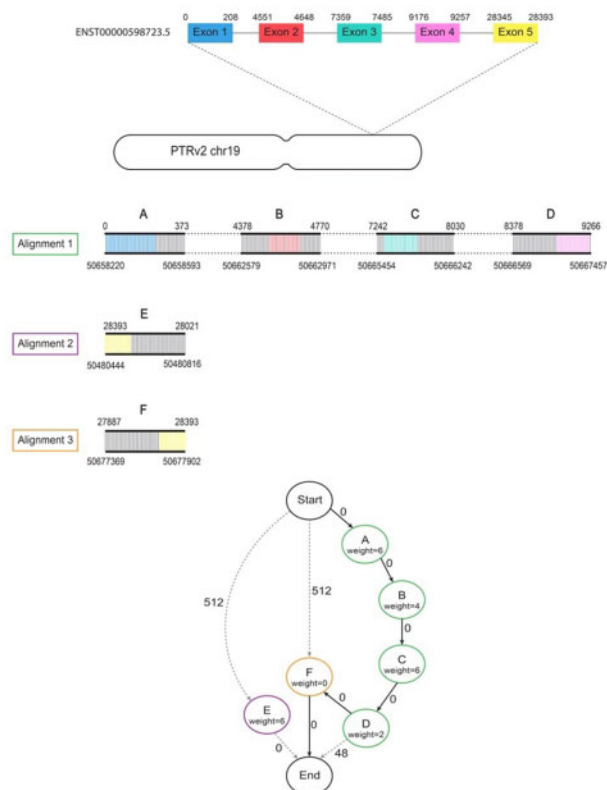

**Fig. 1.** Example of the lift-over process. Diagram showing the steps taken by Liftoff when mapping human transcript ENST00000598723.5 to the chimpanzee (PTRv2) homolog on chromosome 19. Minimap2 produces 3 partial alignments of this gene to PTRv2. Alignment 1 (green) has 4 gapless blocks containing exons 1–4 which are represented by nodes A–D in the graph. The dashed lines in between blocks of the alignment represent gaps/introns. Alignments 2 (purple) and 3 (orange) each have 1 gapless block containing exon 5 represented by nodes E and F respectively. Node E is not on the same strand as alignments 1 and 2 and is therefore only connected to the start and end. The node weights correspond to the exon mismatch penalties (default of 2 per mismatch) and the edge weights are the sum of the exon gap open penalty (2) and gap extension penalty (1). An edge weight of zero means the gaps did not occur within an exon. The shortest path (A, B, C, D, F) is shown with bold arrows and contains complete alignments of all 5 exons with a total of 9 mismatches and 0 gaps

### 2.1 Annotating extra gene copies

Another feature unique to Liftoff is the option to find additional copies of genes in the target assembly not annotated in the reference. With this option enabled, Liftoff maps the complete reference annotation first, and then repeats the lift-over process for all genes. An extra gene copy is annotated if another mapping is found that does not overlap any previously annotated genes, and that meets the user-defined minimum sequence identity threshold. The lift-over procedure is repeated until all valid mappings have been found.

We recently used Liftoff with this feature enabled to annotate our improved assembly of the bread wheat genome, which contains 15.07 gigabases of anchored sequence compared to 13.84 in a previous reference genome (Alonge *et al.*, 2020). In addition to successfully mapping 100 839 of the 105 200 reference genes to this large and complex genome, we found 5799 additional gene copies using a strict sequence identity threshold of 100%.

## 3 Results

Here, we demonstrate Liftoff's ability to lift an annotation to an updated reference genome by lifting genes from the two most recent versions of the human reference genome, GRCh37 and GRCh38. We also demonstrate Liftoff's ability to lift genes between genomes of closely related species by lifting genes from GRCh38 to the

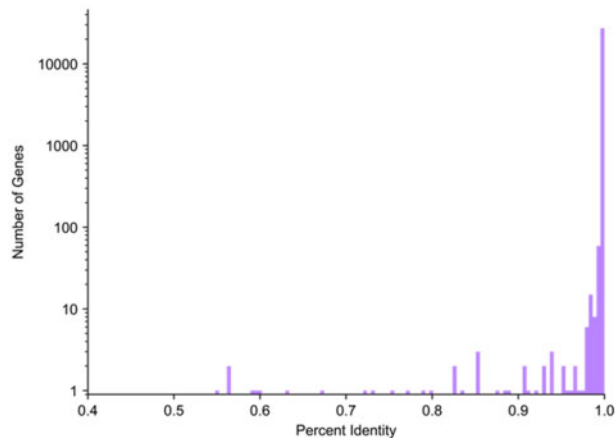

**Fig. 2.** Distribution of GRCh37 and GRCh38 sequence identity. Histogram showing the distribution of exon sequence identity of protein-coding and lncRNA genes in GRCh37 and GRCh38. Log scale used to make the counts of just 1 or 2 genes visible; all bins below 97% identity contain at most 4 genes

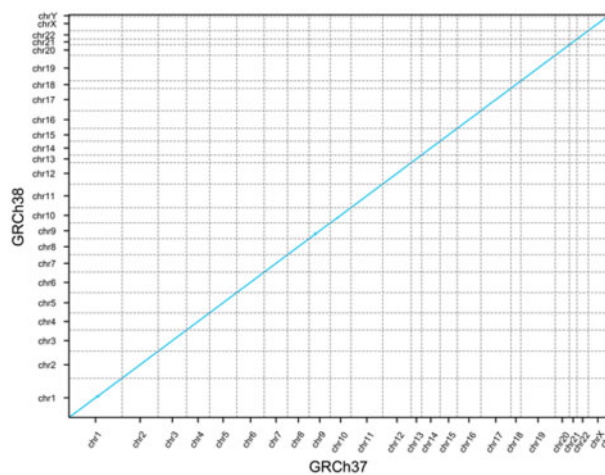

**Fig. 3.** GRCh37 and GRCh38 gene order. Dot plot showing the ordinal position of each gene in GRCh37 on the x-axis and the ordinal position in GRCh38 on the y-axis

chimpanzee genome Clint\_PTRv2. To assess the accuracy of Liftoff in each example, we evaluate the sequence identity and order of mapped genes.

### 3.1 GRCh37 to GRCh38

We attempted to map all protein-coding genes and lncRNAs on primary chromosomes (excluding alternative scaffolds) in the GENCODE v19 annotation (Harrow *et al.*, 2012) from GRCh37 to GRCh38. Out of 27 459 genes, we successfully mapped 27 422 (99.87%). We consider a gene to be successfully mapped if at least 50% of the reference gene maps to the target assembly. Genes that failed to map according to this threshold are listed in [Supplementary Table S1](#). An overwhelming majority of the gene sequences in GRCh38 were nearly identical to the sequences in GRCh37, with an average sequence identity in exons of 99.97% (Fig. 2).

To visualize the co-linearity of the gene order between the two assemblies, we plotted each gene as a single point on a 2D plot where the X coordinate is the ordinal position of the gene in GRCh37 and the Y coordinate is the ordinal position in GRCh38 (Fig. 3).

The gene order appears perfectly co-linear; however, there are some exceptions not visible at the scale of the whole genome. To calculate the number of genes out of order in GRCh38 with respect to

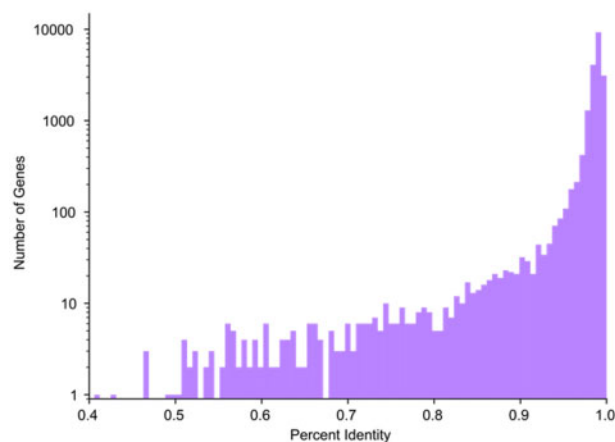

Fig. 4. Distribution of GRCh38 and PTRv2 sequence identity. Histogram showing the distribution of exon sequence identity of protein-coding genes in GRCh38 and PTRv2. Note that the y-axis is shown on a log scale, as in Figure 2

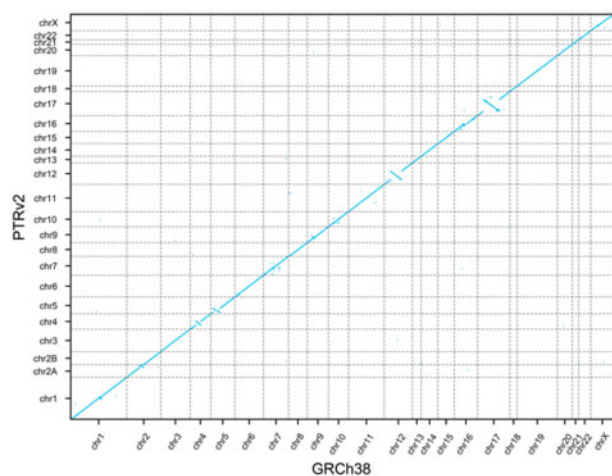

Fig. 5. GRCh38 and PTRv2 gene order. Dot plot showing the ordinal position of each gene in GRCh38 on the x-axis and the ordinal position in PTRv2 on the y-axis

GRCh37, we calculated the edit distance between the gene order in each assembly. This revealed 361 genes (1.3%) in a different relative position in GRCh38 compared to GRCh37.

To compare Liftoff to an existing commonly used method, we lifted over genes between the same 2 assemblies using the UCSC liftOver tool. UCSC liftOver failed to map 125 genes. 63 of these genes mapped end-to-end with Liftoff (Supplementary Table S2) and 27 mapped partially with an alignment coverage less than 100% but greater than the 50% threshold mentioned above.

### 3.2 GRCh38 to PTRv2

We attempted to map all protein-coding genes on chromosomes 1–22 and chromosome X in the GENCODE v33 annotation (Frankish *et al.*, 2019) from GRCh38 to an assembly of the chimpanzee (*Pan troglodytes*), PTRv2 (GenBank accession GCA\_002880755.3). Out of 19 878 genes, we were able to map 19 543 (98.31%). Genes that Liftoff failed to map are listed in Supplementary Table S3. The average sequence identity in exons of successfully mapped genes was 98.21% (Fig. 4).

As was done with the GRCh37 to GRCh38 lift-over, we compared the gene order in GRCh38 to that in PTRv2 and found 2477 genes in PTRv2 to be in a different relative position. Some of these ordinal differences are visible at the whole-genome scale (Fig. 5)

including 4 large regions on the chimpanzee homologues of chromosomes 4, 5, 12 and 17 where the gene order is inverted due to large-scale chromosomal inversions.

We again compared our results to UCSC liftOver. We found that UCSC liftOver failed to map 597 genes. 78 of these genes mapped end-to-end with Liftoff (Supplementary Table S4) and 417 mapped with an alignment coverage less than 100%, but greater than the 50% threshold.

## 4 Discussion

The rapidly growing number of high-quality genome assemblies has greatly increased our potential to understand sequence diversity, but accurate genome annotation is needed to understand the biological impact of this diversity. Rather than annotating genomes *de novo*, we can take advantage of the extensive work that has gone into creating reference annotations for many well-studied species. We developed Liftoff as an accurate tool for transferring gene annotations between genomes of the same or closely related species. Unlike current coordinate lift-over strategies which only consider sequence homology, Liftoff considers the constraints between exons of the same gene and constraint that distinct genes need to map to distinct locations. We demonstrate that this approach can map more genes than sequence homology-based approaches.

We showed that we were able to lift over nearly all genes from GRCh37 to GRCh38. The gene sequences and order are very similar between the two assemblies, with an average sequence identity of >99.9% and only 361 genes appearing in a different order. GRCh38 fixed a number of mis-assemblies and single base errors present in GRCh37 (Guo *et al.*, 2017), so it is expected that the gene sequence and order are not entirely identical. This demonstrates Liftoff's ability to accurately annotate an updated reference assembly, making it a useful tool as reference assemblies are continuously updated.

We also showed that we could lift-over nearly all protein-coding genes from GRCh38 to the chimpanzee genome, PTRv2, with an average sequence identity of 98.2%. This is consistent with previous work showing the human genome and chimpanzee genome are approximately 98% identical (Chimpanzee Sequencing and Analysis Consortium, 2005). Comparing the gene order revealed 4 large regions on the homologs of chromosomes 4, 5, 12 and 17 where the gene order is inverted. These regions are consistent with previous reports: the chimpanzee genome has 9 well-characterized pericentric inversions on chromosome homologs 1, 4, 5, 9, 12, 15, 16, 17 (Yunis *et al.*, 1982). The 4 largest of these inversions are on 4, 5, 12 and 17 (Soto *et al.*, 2020) hence their visibility at this scale. In addition, the co-linear mapping of genes from human chromosome 2 to chimpanzee chromosomes 2A and 2B is consistent with the known telomeric fusion of these chromosomes (Yunis *et al.*, 1982). The consistency of the gene sequence identity with the known genome sequence identity between chimpanzee and human and the consistency of the gene order with the known structural differences between the two genomes demonstrate the accuracy of Liftoff's gene placements in a cross-species lift-over.

There are some limitations with annotating new assemblies using a lift-over strategy rather than *de novo*. First of all, the success of the lift-over is limited by the divergence between the reference and target genomes (Supplementary Fig. S1). Second, the annotation of the new assembly will only be as complete as the reference. However, as more genomes are sequenced and assembled, and reference annotations continue to improve through manual curation, experimental validation or improved computational methods, Liftoff will enable easy integration of these improvements across many genomes. We anticipate that Liftoff will be a valuable tool in improving our understanding of the biological function of the large and rapidly growing number of sequenced genomes.



## Funding

This work was supported in part by the National Institutes of Health [R01-HG006677 and R35-GM130151].

*Conflict of Interest:* none declared.

## References

- Alonge, M. *et al.* (2020) Chromosome-scale assembly of the bread wheat genome reveals thousands of additional gene copies. *Genetics*, **216**, 599–608.
- Chimpanzee Sequencing and Analysis Consortium. (2005) Initial sequence of the chimpanzee genome and comparison with the human genome. *Nature*, **437**, 69–87.
- Church, D.M. *et al.* (2011) Modernizing reference genome assemblies. *PLoS Biol.*, **9**, e1001091.
- Dijkstra, E.W. *et al.* (1959) A note on two problems in connexion with graphs. *Numer. Math.*, **1**, 269–271.
- Frankish, A. *et al.* (2019) GENCODE reference annotation for the human and mouse genomes. *Nucleic Acids Res.*, **47**, D766–D773.
- Gao, B. *et al.* (2018) segment\_liftover: a Python tool to convert segments between genome assemblies. *F1000Res*, **7**, 319.
- Guo, Y. *et al.* (2017) Improvements and impacts of GRCh38 human reference on high throughput sequencing data analysis. *Genomics*, **109**, 83–90.
- Harrow, J. *et al.* (2012) GENCODE: the reference human genome annotation for The ENCODE Project. *Genome Res.*, **22**, 1760–1774.
- He, Y. *et al.* (2019) Long-read assembly of the Chinese rhesus macaque genome and identification of ape-specific structural variants. *Nat. Commun.*, **10**, 4233.
- Jiao, Y. *et al.* (2017) Improved maize reference genome with single-molecule technologies. *Nature*, **546**, 524–527.
- Kuhn, R.M. *et al.* (2013) The UCSC genome browser and associated tools. *Brief. Bioinf.*, **14**, 144–161.
- Li, H. (2018) Minimap2: pairwise alignment for nucleotide sequences. *Bioinformatics*, **34**, 3094–3100.
- Ondov, B.D. *et al.* (2016) Mash: fast genome and metagenome distance estimation using MinHash. *Genome Biol.*, **17**, 132.
- Pertea, G. *et al.* (2020) GFF Utilities: gffRead and GffCompare. *F1000Res*, **9**, 304.
- Shirley, M.D. *et al.* (2015) Efficient ‘pythonic’ access to FASTA files using pyfaidx. *PeerJ PrePrints* 3:e1196. 2015.
- Shumate, A. *et al.* (2020) Assembly and annotation of an Ashkenazi human reference genome. *Genome Biol.*, **21**, 129.
- Soto, D.C. *et al.* (2020) Identification of structural variation in chimpanzees using optical mapping and nanopore sequencing. *Genes*, **11**, 276.
- Yunis, J.J. *et al.* (1982) The origin of man: a chromosomal pictorial legacy. *Science*, **215**, 1525–1530.
- Zhao, H. *et al.* (2014) CrossMap: a versatile tool for coordinate conversion between genome assemblies. *Bioinformatics*, **30**, 1006–1007.
